# Supplementary material
Source: Springer Nature journal article supplement (https://www.springermedizin.de/resource/supplementary/12916_2011_392_MOESM3_ESM.pdf/9599826)

# Number of encounters

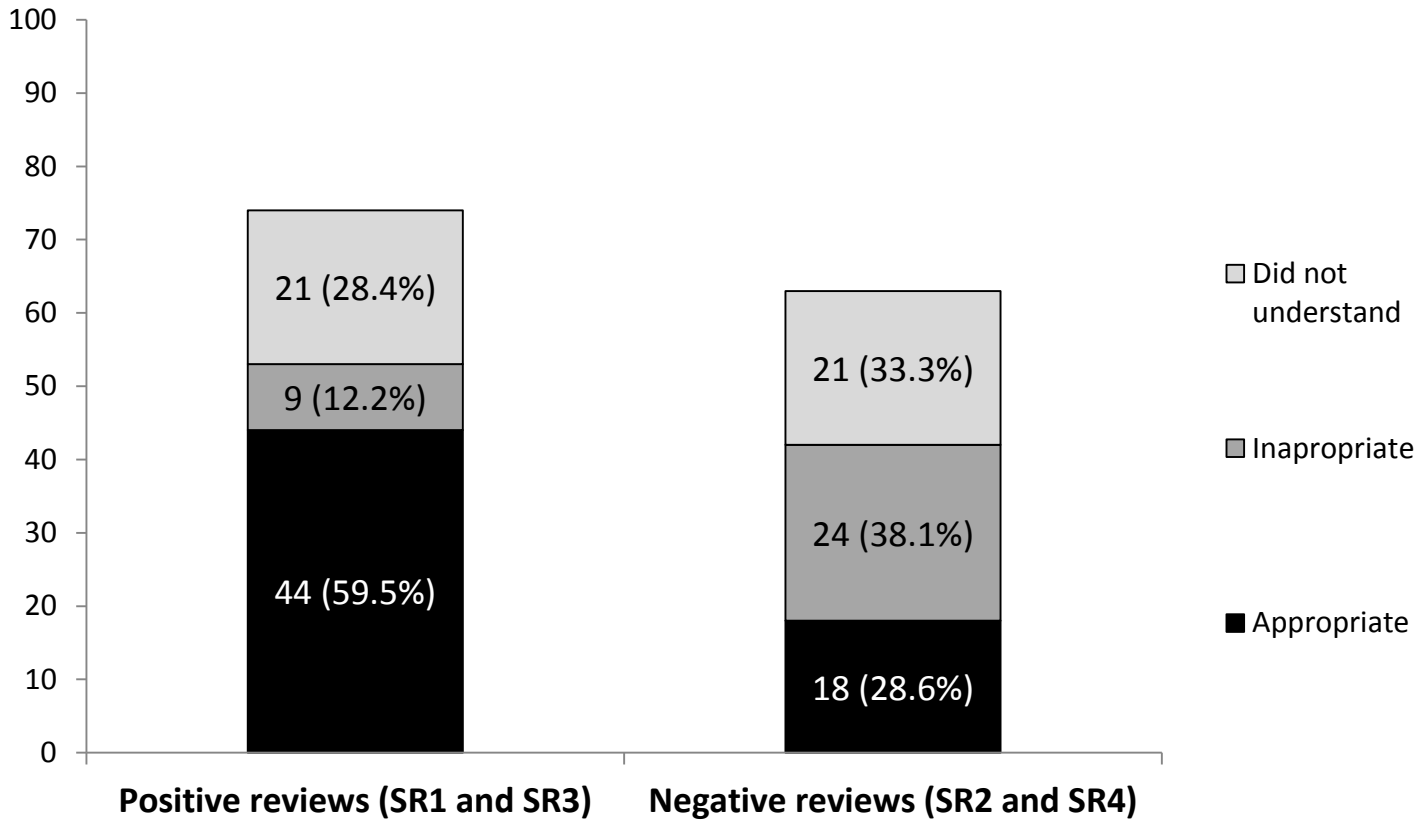

Participants who were previously unsure

Supplement: MOESM3 [file 9599826]
